# Supplementary material
Source: Elsevier journal article supplement (https://www.sciencedirect.com/science/article/pii/S0025775316301786)
Supplement: mmc1 [file S0025775316301786:mmc1.docx]

**Anexo I. Cuestionario ACTS.**
